# Supplementary material for: Understanding the electrochemical properties of Mg-doped Li2MnO3: first-principles calculations
Source: Royal Society of Chemistry journal article supplement (doi:10.1039/d4cp01733a), 2024-01-01
Supplement: d4cp01733a1.pdf [file d4cp01733a1.pdf]

## **Understanding the electrochemical properties of Mg doped**

### **Li<sub>2</sub>MnO<sub>3</sub>: First-principles calculations**

Ziquan Zeng<sup>1</sup>, Jianchuan Wang<sup>1</sup>, Shiwei Zhang<sup>2</sup>, Bo Han<sup>1</sup>, Feng Dang<sup>3</sup>, Songlin Li<sup>1</sup>, Yong Du<sup>1</sup>

1 State Key Laboratory of Powder Metallurgy, Central South University, 410083, Changsha, China

2 College of Energy and Electrical Engineering, Qinghai University, 810016, Xining, China

3 Key Laboratory for Liquid-Solid Structure Evolution and Processing of Materials (Ministry of Education), Shandong University, 250061, Jinan, China

| System                                             | Lattice parameter (Å) |       |        |
|----------------------------------------------------|-----------------------|-------|--------|
|                                                    | a                     | b     | c      |
| Li <sub>2</sub> MnO <sub>3</sub>                   | 10.020                | 8.660 | 10.181 |
| Mg <sub>2b</sub> -Li <sub>2</sub> MnO <sub>3</sub> | 10.024                | 8.663 | 10.186 |
| Mg <sub>4h</sub> -Li <sub>2</sub> MnO <sub>3</sub> | 10.024                | 8.662 | 10.186 |

**Table S1.** Calculated lattice parameters of the supercells for pristine and Mg-doped Li<sub>2</sub>MnO<sub>3</sub>.

| System                                             | Element          | Atoms | Formation energy (eV) |
|----------------------------------------------------|------------------|-------|-----------------------|
| Mg <sub>2b</sub> -Li <sub>x</sub> MnO <sub>3</sub> | Li <sub>4h</sub> | (a)   | 3.84                  |
|                                                    |                  | (b)   | 3.42                  |
|                                                    |                  | (c)   | 3.91                  |
| Li <sub>x</sub> MnO <sub>3</sub>                   | Li <sub>4h</sub> | (a)   | 4.62                  |
|                                                    |                  | (b)   | 4.59                  |
|                                                    |                  | (c)   | 4.68                  |

**Table S2.** Calculated formation energies of different Li<sub>4h</sub> vacancies in Fig. S2.

| System                                          | $x$  | Bader charge (e) of O |                    |                    |                    |                    |                    |                    |
|-------------------------------------------------|------|-----------------------|--------------------|--------------------|--------------------|--------------------|--------------------|--------------------|
|                                                 |      | O1                    | O2                 | O3                 | O4                 | O5                 | O6                 | O                  |
| $\text{Mg}_{2b}^-$<br>$\text{Li}_x\text{MnO}_3$ | 2    | -1.276<br>(-1.205)    | -1.282<br>(-1.230) | -1.276<br>(-1.201) | -1.276<br>(-1.204) | -1.282<br>(-1.230) | -1.276<br>(-1.201) | -1.278<br>(-1.212) |
|                                                 | 1.75 | -1.236<br>(-1.176)    | -1.199<br>(-1.112) | -1.190<br>(-1.109) | -1.236<br>(-1.176) | -1.199<br>(-1.112) | -1.190<br>(-1.109) | -1.208<br>(-1.132) |
|                                                 | 1.5  | -1.222<br>(-1.162)    | -1.190<br>(-1.115) | -1.185<br>(-1.114) | -1.222<br>(-1.162) | -1.190<br>(-1.115) | -1.185<br>(-1.114) | -1.199<br>(-1.131) |
|                                                 | 1.25 | -1.140<br>(-1.055)    | -1.190<br>(-1.091) | -1.140<br>(-1.055) | -1.140<br>(-1.055) | -1.190<br>(-1.090) | -1.140<br>(-1.055) | -1.156<br>(-1.067) |
|                                                 | 1    | -1.029<br>(-1.072)    | -1.144<br>(-1.072) | -1.082<br>(-1.042) | -1.029<br>(-1.042) | -1.144<br>(-1.042) | -1.082<br>(-1.042) | -1.085<br>(-1.051) |
| $\text{Mg}_{4h}^-$<br>$\text{Li}_x\text{MnO}_3$ | 2    | -1.302<br>(-1.230)    | -1.239<br>(-1.201) | -1.238<br>(-1.204) | -1.302<br>(-1.230) | -1.239<br>(-1.201) | -1.239<br>(-1.204) | -1.260<br>(-1.212) |
|                                                 | 1.75 | -1.189<br>(-1.112)    | -1.226<br>(-1.109) | -1.225<br>(-1.038) | -1.189<br>(-1.112) | -1.226<br>(-1.109) | -1.226<br>(-1.039) | -1.213<br>(-1.086) |
|                                                 | 1.5  | -1.189<br>(-1.115)    | -1.209<br>(-1.114) | -1.123<br>(-0.877) | -1.189<br>(-1.115) | -1.209<br>(-1.114) | -1.209<br>(-0.877) | -1.173<br>(-1.036) |
|                                                 | 1.25 | -1.185<br>(-1.090)    | -1.121<br>(-1.055) | -1.008<br>(-0.934) | -1.185<br>(-1.090) | -1.121<br>(-1.055) | -1.121<br>(-0.934) | -1.105<br>(-1.027) |
|                                                 | 1    | -1.083<br>(-1.090)    | -1.033<br>(-1.050) | -1.014<br>(-0.906) | -1.083<br>(-1.090) | -1.033<br>(-1.050) | -1.033<br>(-0.906) | -1.049<br>(-1.015) |

**Table S3.** Bader charges of O around Mg/Li in each delithiation stage. The values in brackets are the Bader charges of O anions in the undoped  $\text{Li}_2\text{MnO}_3$ . The last column shows the averaged value of O.

| System                                                 | $x$  | Bader charge (e) of Mn |                    |                    |                    |                    |                    |                    |
|--------------------------------------------------------|------|------------------------|--------------------|--------------------|--------------------|--------------------|--------------------|--------------------|
|                                                        |      | Mn1                    | Mn2                | Mn3                | Mn4                | Mn5                | Mn6                | Mn                 |
| Mg <sub>2b</sub> -<br>Li <sub>x</sub> MnO <sub>3</sub> | 2    | +1.852<br>(+1.860)     | +1.852<br>(+1.860) | +1.793<br>(+1.860) | +1.852<br>(+1.860) | +1.852<br>(+1.860) | +1.793<br>(+1.860) | +1.832<br>(+1.860) |
|                                                        | 1.75 | +1.843<br>(+1.852)     | +1.860<br>(+1.864) | +1.868<br>(+1.876) | +1.860<br>(+1.864) | +1.843<br>(+1.852) | +1.856<br>(+1.861) | +1.855<br>(+1.861) |
|                                                        | 1.5  | +1.858<br>(+1.863)     | +1.868<br>(+1.870) | +1.874<br>(+1.884) | +1.868<br>(+1.870) | +1.858<br>(+1.863) | +1.867<br>(+1.873) | +1.866<br>(+1.870) |
|                                                        | 1.25 | +1.868<br>(+1.873)     | +1.868<br>(+1.874) | +1.882<br>(+1.882) | +1.868<br>(+1.874) | +1.868<br>(+1.873) | +1.882<br>(+1.882) | +1.873<br>(+1.876) |
|                                                        | 1    | +1.873<br>(+1.881)     | +1.873<br>(+1.881) | +1.891<br>(+1.881) | +1.873<br>(+1.881) | +1.873<br>(+1.886) | +1.890<br>(+1.886) | +1.879<br>(+1.883) |
| Mg <sub>4h</sub> -<br>Li <sub>x</sub> MnO <sub>3</sub> | 2    | +1.787<br>(+1.860)     | +1.787<br>(+1.860) | +1.822<br>(+1.860) | +1.822<br>(+1.860) | –<br>–             | –<br>–             | +1.806<br>(+1.860) |
|                                                        | 1.75 | +1.846<br>(+1.852)     | +1.846<br>(+1.852) | +1.823<br>(+1.864) | +1.823<br>(+1.864) | –<br>–             | –<br>–             | +1.831<br>(+1.858) |
|                                                        | 1.5  | +1.863<br>(+1.863)     | +1.863<br>(+1.863) | +1.837<br>(+1.870) | +1.837<br>(+1.870) | –<br>–             | –<br>–             | +1.850<br>(+1.866) |
|                                                        | 1.25 | +1.867<br>(+1.873)     | +1.867<br>(+1.873) | +1.860<br>(+1.874) | +1.860<br>(+1.874) | –<br>–             | –<br>–             | +1.864<br>(+1.874) |
|                                                        | 1    | +1.874<br>(+1.879)     | +1.874<br>(+1.879) | +1.867<br>(+1.881) | +1.867<br>(+1.881) | –<br>–             | –<br>–             | +1.871<br>(+1.881) |

**Table S4.** Bader charges of Mn around Mg/Li in each delithiation stage. The values in brackets are the Bader charges of Mn anions in the undoped Li<sub>2</sub>MnO<sub>3</sub>. The serial numberS for Mn are shwn in Fig. S4 and the last column shows the averaged value of Mn.

| System                                   | $x$  | Formation energy (eV) |
|------------------------------------------|------|-----------------------|
| $\text{Li}_x\text{MnO}_3$                | 2    | 2.61                  |
|                                          | 1.75 | 0.70                  |
|                                          | 1.5  | 0.34                  |
|                                          | 1.25 | 0.06                  |
|                                          | 1    | -0.38                 |
| $\text{Mg}_{2b}\text{-Li}_x\text{MnO}_3$ | 2    | 3.63                  |
|                                          | 1.75 | 1.52                  |
|                                          | 1.5  | 1.27                  |
|                                          | 1.25 | 0.50                  |
|                                          | 1    | 0.06                  |
| $\text{Mg}_{4h}\text{-Li}_x\text{MnO}_3$ | 2    | 3.65                  |
|                                          | 1.75 | 1.36                  |
|                                          | 1.5  | 0.96                  |
|                                          | 1.25 | 0.45                  |
|                                          | 1    | -0.02                 |

**Table S5.** Average formation energy of O vacancies around the doping site at different delithiation stages in  $\text{Li}_x\text{MnO}_3$ ,  $\text{Mg}_{2b}\text{-Li}_x\text{MnO}_3$  and  $\text{Mg}_{4h}\text{-Li}_x\text{MnO}_3$ .

| Path   | Diffusion barrier (eV)    |                                          |                                          |
|--------|---------------------------|------------------------------------------|------------------------------------------|
|        | $\text{Li}_2\text{MnO}_3$ | $\text{Mg}_{2b}\text{-Li}_2\text{MnO}_3$ | $\text{Mg}_{4h}\text{-Li}_2\text{MnO}_3$ |
| 2c-4h1 | 0.62                      | 0.59                                     | 0.79                                     |
| 2c-4h2 | 0.88                      | 0.78                                     | 0.82                                     |
| 2b-4h1 | 0.78                      | 0.84                                     | 0.86                                     |

**Table S6.** The energy barrier for Li vacancy diffusion along path 2c-4h1, path 2c-4h2 and path 2b-4h1 in  $\text{Li}_2\text{MnO}_3$ ,  $\text{Mg}_{2b}\text{-Li}_2\text{MnO}_3$  and  $\text{Mg}_{4h}\text{-Li}_2\text{MnO}_3$ .

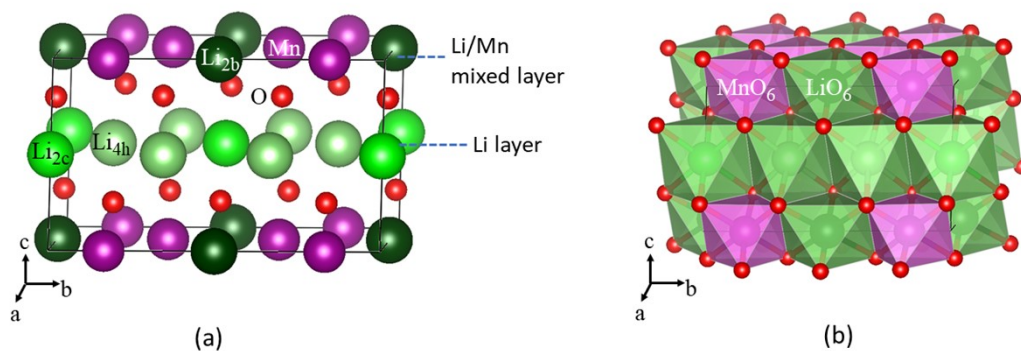

**Fig. S1.** (a) Monoclinic  $\text{Li}_2\text{MnO}_3$  structure with a  $C2/m$  space group and the atomic occupation positions of Li, Mn and O atoms. (b) Illustration of the  $\text{MnO}_6$  and  $\text{LiO}_6$  octahedra.

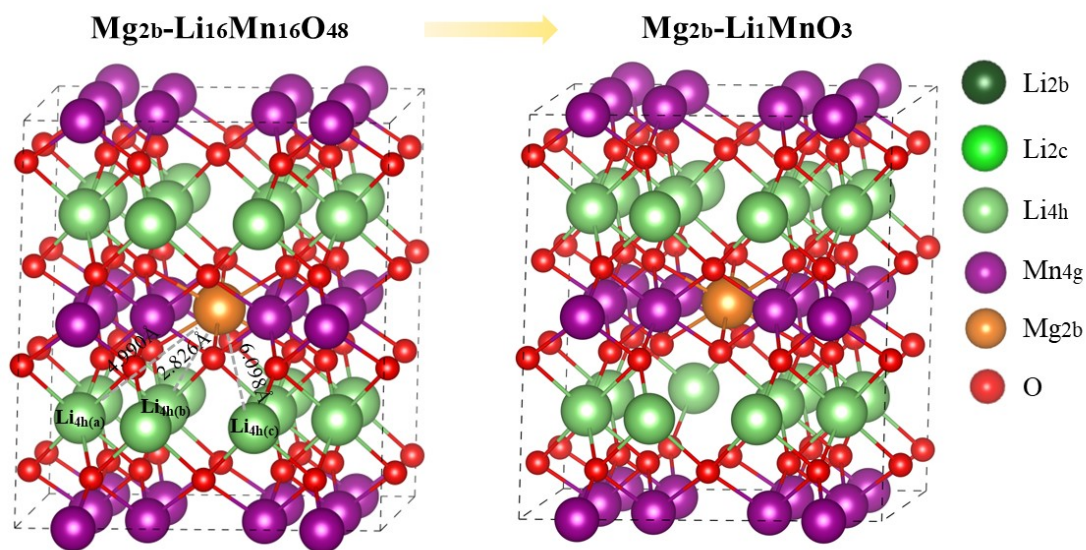

**Fig. S2.** The three un-equivalent 4h Li in the vicinity of doped Mg in  $\text{Mg}_{2b}\text{-Li}_x\text{MnO}_3$ .

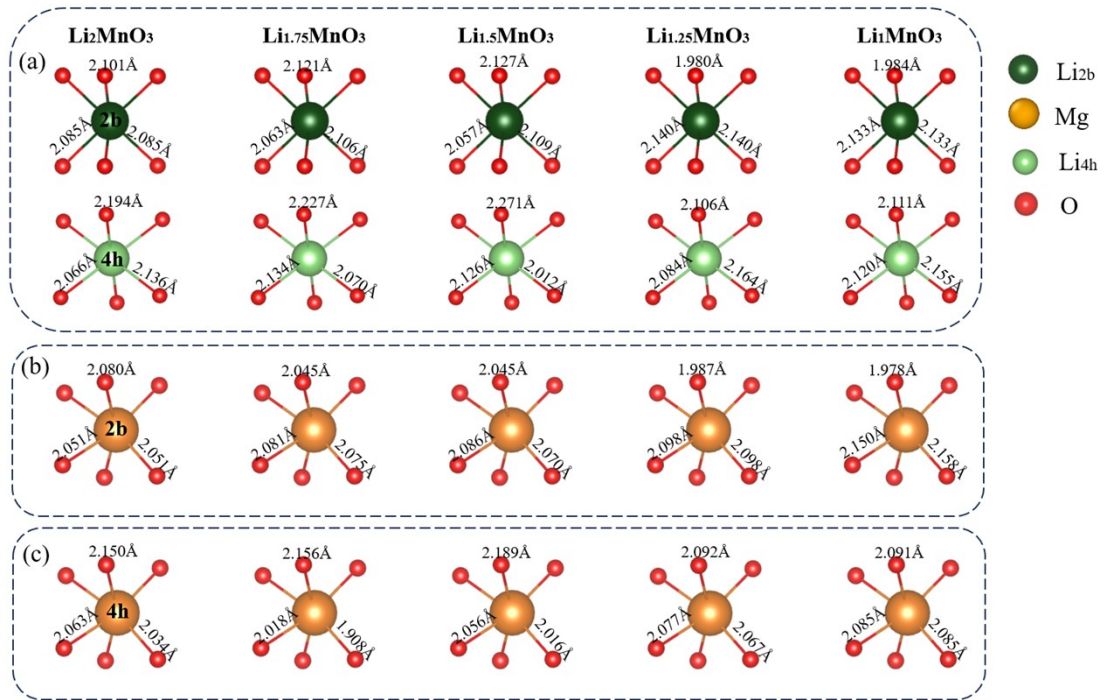

**Fig. S3.** Bond lengths of Li-O or Mg-O in (a)  $\text{Li}_x\text{MnO}_3$ , (b)  $\text{Mg}_{2b}\text{-Li}_x\text{MnO}_3$ , and (c)  $\text{Mg}_{4h}\text{-Li}_x\text{MnO}_3$  ( $x = 2, 1.75, 1.5, 1.25, \text{ and } 1$ ).

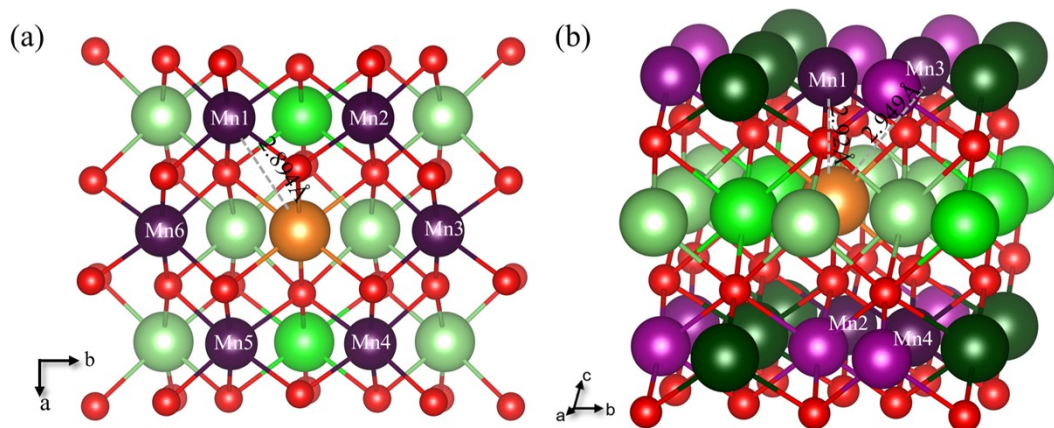

**Fig. S4.** Schematic shows the nearby by Mn ions of Mg in (a)  $\text{Mg}_{26}\text{-Li}_2\text{MnO}_3$  and (c)  $\text{Mg}_{4h}\text{-Li}_2\text{MnO}_3$ .

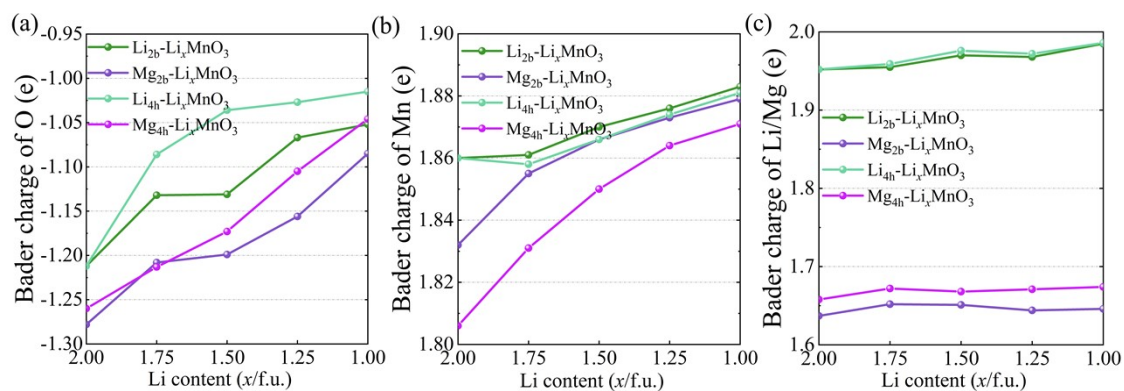

**Fig. S5** The average Bader charge of (a) O in  $\text{LiO}_6$  or  $\text{MgO}_6$  octahedron, (b) Mn around Li or Mg, and (c) Li and doped Mg at different delithiation stages of  $\text{Li}_x\text{MnO}_3$  ( $x = 2, 1.75, 1.5, 1.25, \text{ and } 1$ ).



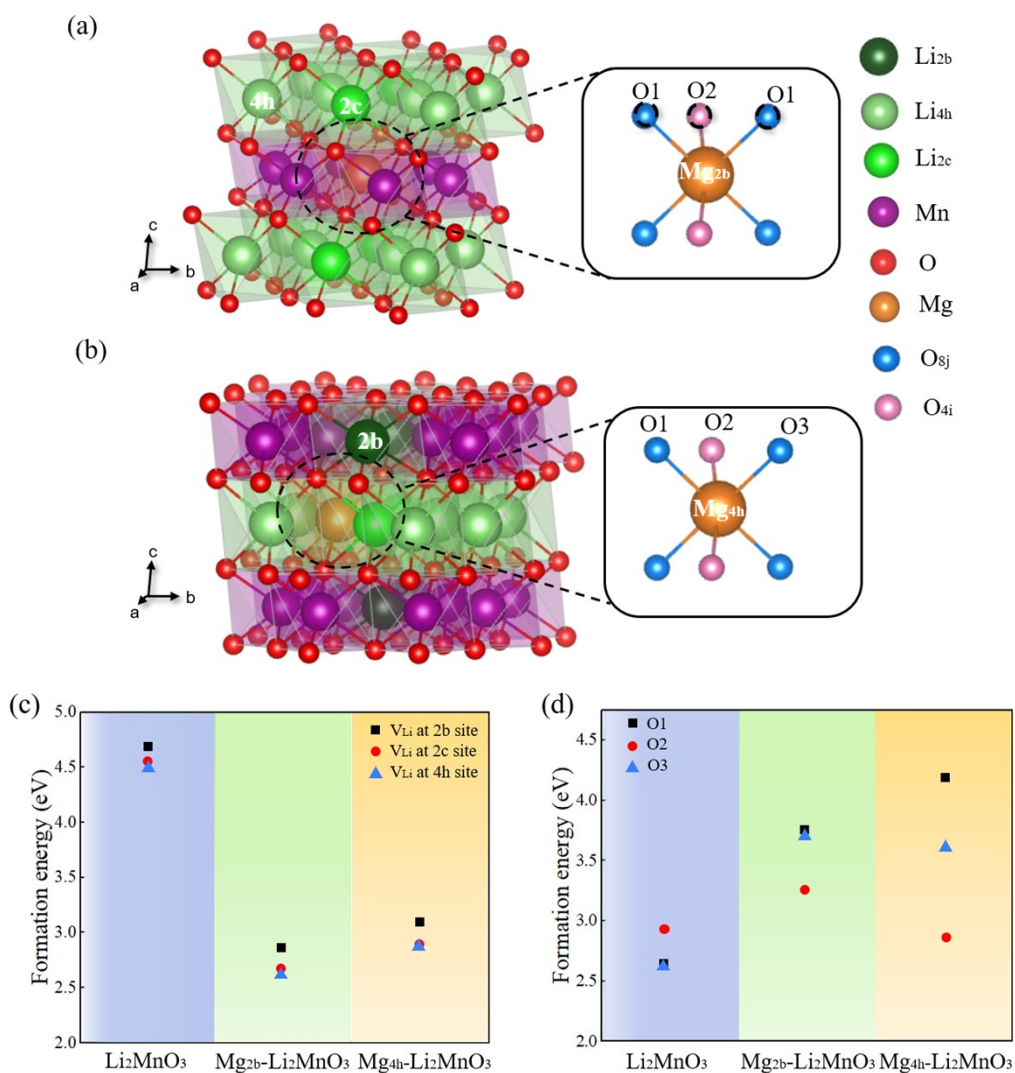

**Fig. S6.** (a) Illustration of different oxygen atoms (O1 and O2) near the doping site in the  $\text{Mg}_{2b}\text{-Li}_2\text{MnO}_3$ . (b) Illustration of different oxygen atoms (O1, O2, and O3) near the doping site in the  $\text{Mg}_{4h}\text{-Li}_2\text{MnO}_3$ . (c) Formation energies of different Li vacancies in pure and Mg doped  $\text{Li}_2\text{MnO}_3$ . (d) Formation energies of different O vacancies in pure and Mg doped  $\text{Li}_2\text{MnO}_3$ .
